# Supplementary material for: Metabolic profiling of maternal serum of women at high-risk of spontaneous preterm birth using NMR and MGWAS approach
Source: Oxford University Press journal article supplement (doi:10.1042/bsr20210759), 2021-08-17
Supplement: bsr-2021-0759_supp.pdf [file bsr-2021-0759_supp.pdf]

## Supplementary Information

# Metabolic profiling of maternal serum of women at high-risk of spontaneous preterm birth using NMR and mGWAS approach

*Juhi K. Gupta*<sup>1,2\*</sup>, *Angharad Care*<sup>2</sup>, *Laura Goodfellow*<sup>2</sup>, *Zarko Alfirevic*<sup>2</sup>, *Lu-Yun Lian*<sup>4</sup>, *Bertram Müller-Myhsok*<sup>1,3</sup>, *Ana Alfirevic*<sup>1,2</sup>, *Marie M. Phelan*<sup>4</sup>

<sup>1</sup> Wolfson Centre for Personalised Medicine, Department of Pharmacology and Therapeutics, Institute of Systems, Molecular and Integrative Biology, University of Liverpool, Liverpool, L69 3GL, UK

<sup>2</sup> Harris-Wellbeing Research Centre, University Department, Liverpool Women's Hospital, Crown Street, Liverpool, L8 7SS, UK

<sup>3</sup> Max Planck Institute of Psychiatry, 80804, Munich, Germany

<sup>4</sup> NMR Centre for Structural Biology, Institute of Systems, Molecular and Integrative Biology, University of Liverpool, Liverpool, L69 7ZB, UK

## Table of contents

**Figure S1.** Twenty-four representative serum NMR spectra with metabolite standards from the PTB cohort.

**Figure S2.** PLS-DA of metabolite bins at week 16 of gestation.

**Figure S3.** PLS-DA of metabolite bins at week 20 of gestation.

**Table S1.** Probabilistic neural network (PNN) results at week 16 and 20 of gestation.

**Table S2.** FUMA SNP annotation and gene set enrichment analysis of significant SNPs from mGWAS.

**Figure S4.** Enriched differentially expressed gene sets (DEG) from lactate (4.11 ppm) mGWAS analysis at week 20 of gestation.

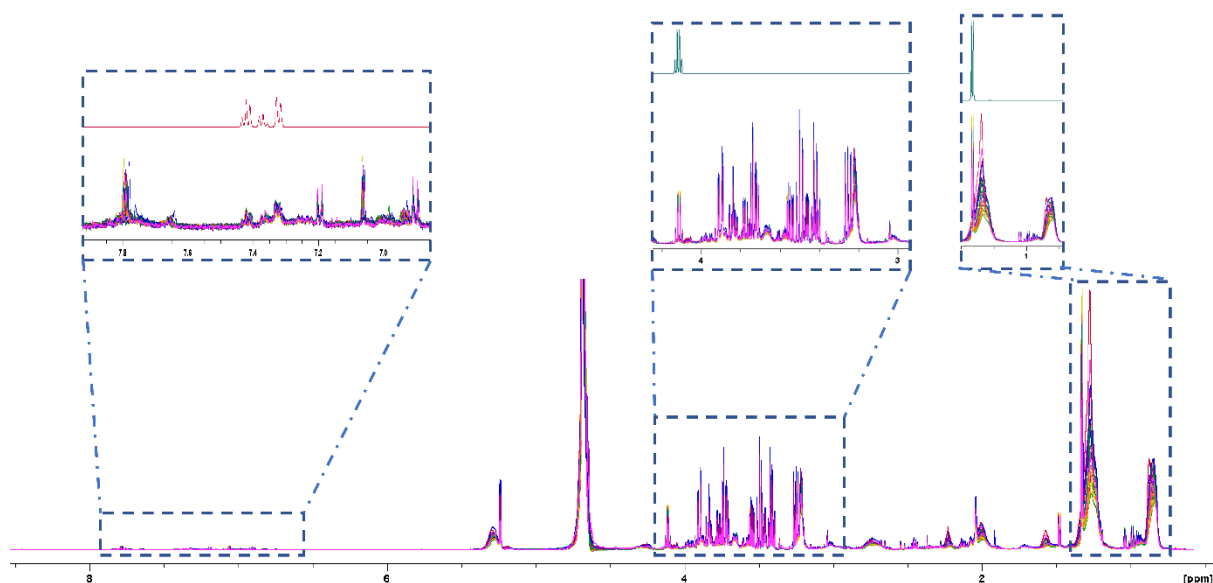

**Figure S1. Twenty-four representative serum NMR spectra with metabolite standards from the PTB cohort.** The top 3 inserts highlight the regions of interest from the spectra and their corresponding metabolite standards. From left to right, region 7.9-6.9 ppm shows stacked plot with phenylalanine aromatic peaks from in-house standard (red spectrum), region 4.2-3.0 ppm shows stacked plot with lactate quartet peak from in-house standard (green spectrum) and region 1.4-0.8 ppm shows stacked plot with lactate doublet peak from in-house standard (green spectrum).

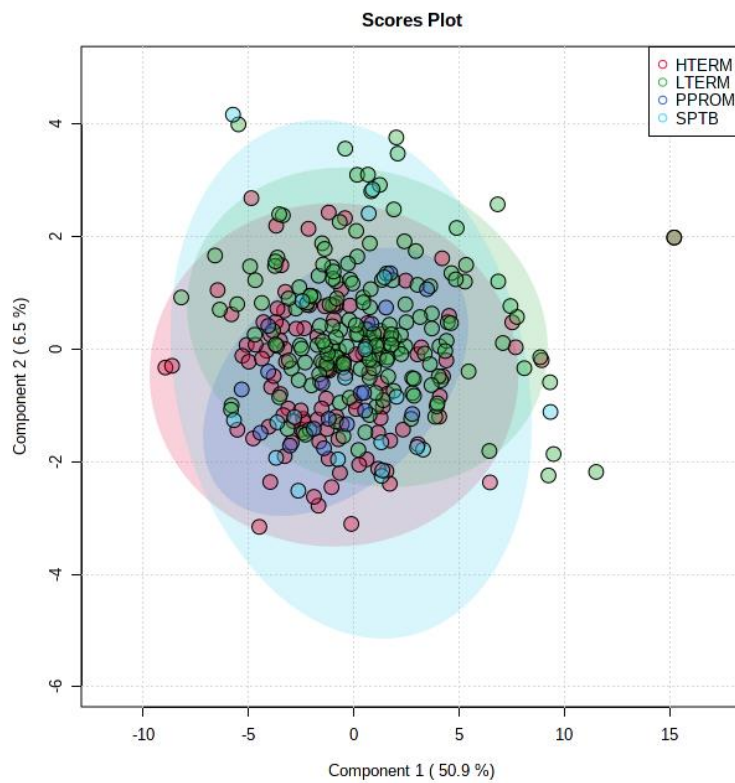

**Figure S2. PLS-DA score plot of metabolite bins at week 16 of gestation.** Variance explained is shown by the percentage for each component. This figure generated using MetaboAnalyst [34].

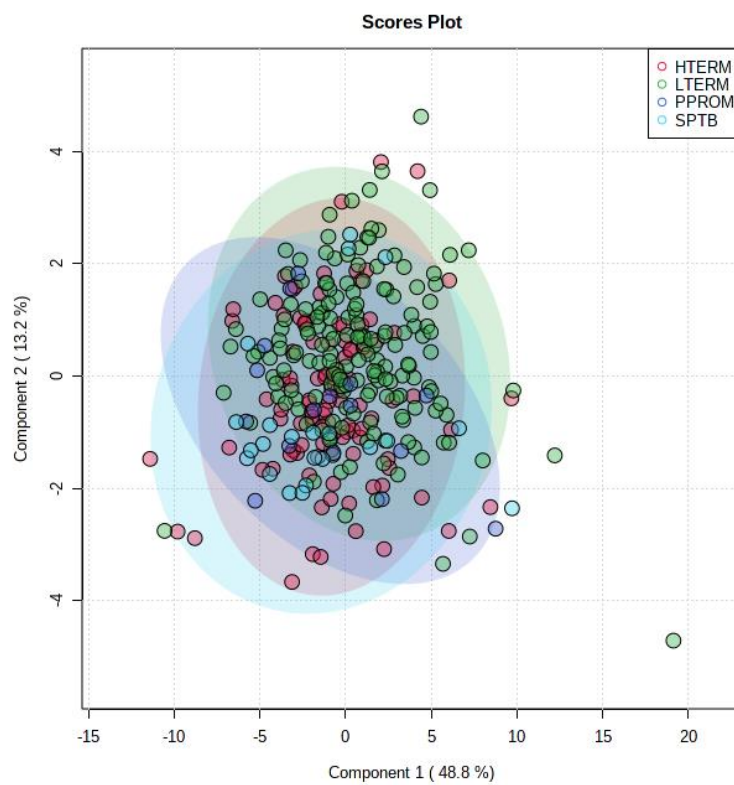

**Figure S3. PLS-DA score plot of metabolite bins at week 20 of gestation.** Variance explained is shown by the percentage for each component. This figure generated using MetaboAnalyst [34].

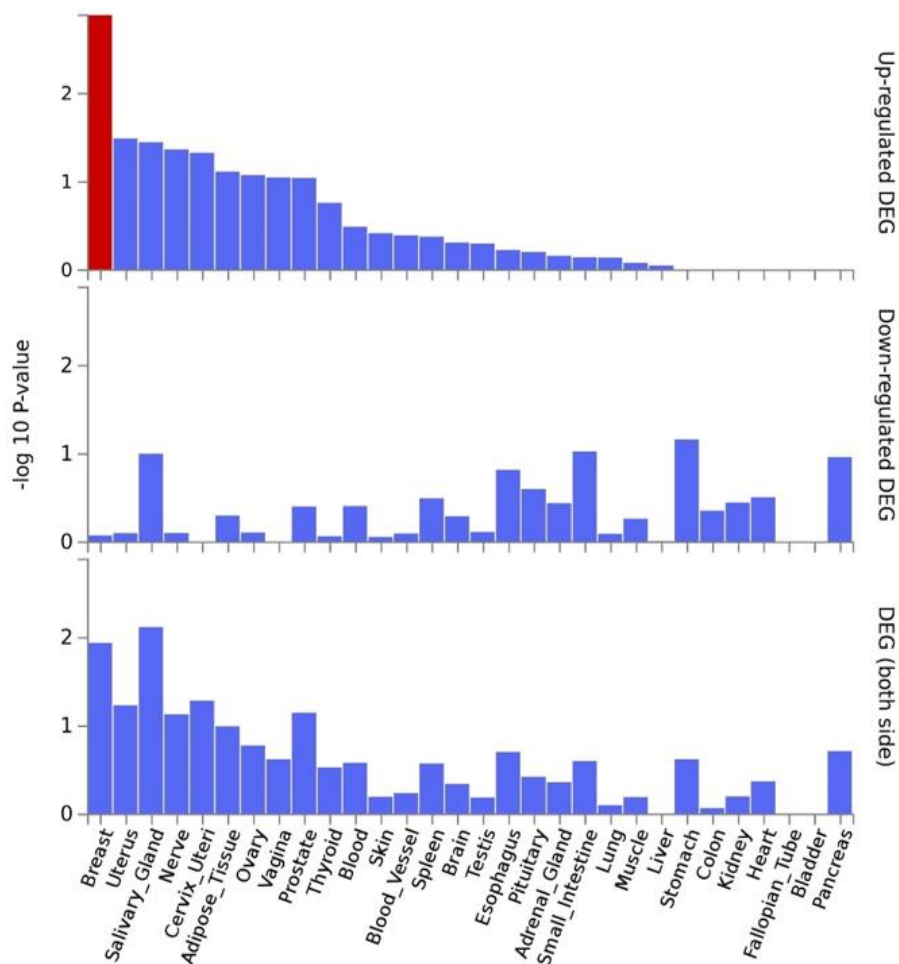

**Figure S4. Enriched differentially expressed gene sets (DEG) from lactate (4.11 ppm) mGWAS analysis at week 20 of gestation.** DEGs were defined by two-sided t-tests applied across the mGWAS genes and tissue types from the GTEx v8 database in FUMA GWAS software [48]. DEG in breast tissue (red) was significantly enriched (Bonferroni  $p < 0.05$ ) followed by uterus tissue (also upregulated).

**Table S1. Probabilistic neural network (PNN) modelling of metabolite bins at week 16 and 20 of gestation.** Week 20 showed stronger prediction (AUC, C-statistics=0.887). At week 16 of gestation the AUC value (or C-statistic) achieved was 0.766.

| Week 16 Validation Data                                                                                                                                                                                                                                                                                                                                                                                                                                                                                                                                                                                                                                                                                                                             |                  | Week 20 Validation Data                                                                                                                                                                                                                                                                                                                                                                                                                                                                                                                                                                                                                                                                                                                              |                  |
|-----------------------------------------------------------------------------------------------------------------------------------------------------------------------------------------------------------------------------------------------------------------------------------------------------------------------------------------------------------------------------------------------------------------------------------------------------------------------------------------------------------------------------------------------------------------------------------------------------------------------------------------------------------------------------------------------------------------------------------------------------|------------------|------------------------------------------------------------------------------------------------------------------------------------------------------------------------------------------------------------------------------------------------------------------------------------------------------------------------------------------------------------------------------------------------------------------------------------------------------------------------------------------------------------------------------------------------------------------------------------------------------------------------------------------------------------------------------------------------------------------------------------------------------|------------------|
| Actual : ----Predicted Category---<br>Category: case control<br>-----:-----<br>case: 12 26<br>control: 1 290<br><br>----- Validation Data -----<br><br>Total records = 329<br>Positive/Negative ratio = 7.6579<br>Accuracy = 91.79%<br>True positive (TP) = 290 (88.15%)<br>True negative (TN) = 12 (3.65%)<br>False positive (FP) = 26 (7.90%)<br>False negative (FN) = 1 (0.30%)<br>Sensitivity = 99.66%<br>Specificity = 31.58%<br>Geometric mean of sensitivity and specificity = 56.10%<br>Positive Predictive Value (PPV) = 91.77%<br>Negative Predictive Value (NPV) = 92.31%<br>Geometric mean of PPV and NPV = 92.04%<br>Precision = 91.77%<br>Recall = 99.66%<br>F-Measure = 0.9555<br>Area under ROC curve (AUC, C-Statistic) = 0.766323 |                  | Actual : ----Predicted Category---<br>Category: case control<br>-----:-----<br>case: 30 8<br>control: 0 280<br><br>----- Validation Data -----<br><br>Total records = 318<br>Positive/Negative ratio = 0.1357<br>Accuracy = 97.48%<br>True positive (TP) = 30 (9.43%)<br>True negative (TN) = 280 (88.05%)<br>False positive (FP) = 0 (0.00%)<br>False negative (FN) = 8 (2.52%)<br>Sensitivity = 78.95%<br>Specificity = 100.00%<br>Geometric mean of sensitivity and specificity = 88.85%<br>Positive Predictive Value (PPV) = 100.00%<br>Negative Predictive Value (NPV) = 97.22%<br>Geometric mean of PPV and NPV = 98.60%<br>Precision = 100.00%<br>Recall = 78.95%<br>F-Measure = 0.8824<br>Area under ROC curve (AUC, C-Statistic) = 0.886842 |                  |
| Week 16 metabolite bin (chemical shift in ppm)                                                                                                                                                                                                                                                                                                                                                                                                                                                                                                                                                                                                                                                                                                      | Importance score | Week 20 metabolite bin (chemical shift in ppm)                                                                                                                                                                                                                                                                                                                                                                                                                                                                                                                                                                                                                                                                                                       | Importance score |
| unknown (3.32)                                                                                                                                                                                                                                                                                                                                                                                                                                                                                                                                                                                                                                                                                                                                      | 100              | unknown (7.28)                                                                                                                                                                                                                                                                                                                                                                                                                                                                                                                                                                                                                                                                                                                                       | 100              |
| proline (3.37)                                                                                                                                                                                                                                                                                                                                                                                                                                                                                                                                                                                                                                                                                                                                      | 95.582           | phenylalanine (7.34)                                                                                                                                                                                                                                                                                                                                                                                                                                                                                                                                                                                                                                                                                                                                 | 61.121           |
| phenylalanine (7.43)                                                                                                                                                                                                                                                                                                                                                                                                                                                                                                                                                                                                                                                                                                                                | 87.738           | creatinine (4.06)                                                                                                                                                                                                                                                                                                                                                                                                                                                                                                                                                                                                                                                                                                                                    | 59.146           |
| unknown (7.28)                                                                                                                                                                                                                                                                                                                                                                                                                                                                                                                                                                                                                                                                                                                                      | 79.361           | desaminotyrosine (7.15)                                                                                                                                                                                                                                                                                                                                                                                                                                                                                                                                                                                                                                                                                                                              | 31.221           |
| unknown (4.4)                                                                                                                                                                                                                                                                                                                                                                                                                                                                                                                                                                                                                                                                                                                                       | 0.776            | glucose (3.41)                                                                                                                                                                                                                                                                                                                                                                                                                                                                                                                                                                                                                                                                                                                                       | 25.793           |
| glucarate (4.14)                                                                                                                                                                                                                                                                                                                                                                                                                                                                                                                                                                                                                                                                                                                                    | 0.648            | phenylalanine (7.43)                                                                                                                                                                                                                                                                                                                                                                                                                                                                                                                                                                                                                                                                                                                                 | 17.521           |
| 3-hydroxybutyrate (1.2)                                                                                                                                                                                                                                                                                                                                                                                                                                                                                                                                                                                                                                                                                                                             | 0.47             | acetate (1.92)                                                                                                                                                                                                                                                                                                                                                                                                                                                                                                                                                                                                                                                                                                                                       | 17.317           |
| desaminotyrosine (6.83)                                                                                                                                                                                                                                                                                                                                                                                                                                                                                                                                                                                                                                                                                                                             | 0.454            | unknown (3.3)                                                                                                                                                                                                                                                                                                                                                                                                                                                                                                                                                                                                                                                                                                                                        | 14.371           |
| unknown (2.7)                                                                                                                                                                                                                                                                                                                                                                                                                                                                                                                                                                                                                                                                                                                                       | 0.454            | desaminotyrosine (6.83)                                                                                                                                                                                                                                                                                                                                                                                                                                                                                                                                                                                                                                                                                                                              | 11.222           |
| unknown (2.68)                                                                                                                                                                                                                                                                                                                                                                                                                                                                                                                                                                                                                                                                                                                                      | 0.432            | unknown (3.64)                                                                                                                                                                                                                                                                                                                                                                                                                                                                                                                                                                                                                                                                                                                                       | 10.373           |
| unknown (4.46)                                                                                                                                                                                                                                                                                                                                                                                                                                                                                                                                                                                                                                                                                                                                      | 0.423            | unknown (3.64)                                                                                                                                                                                                                                                                                                                                                                                                                                                                                                                                                                                                                                                                                                                                       | 7.792            |
| desaminotyrosine (7.15)                                                                                                                                                                                                                                                                                                                                                                                                                                                                                                                                                                                                                                                                                                                             | 0.421            | histidine (7.81)                                                                                                                                                                                                                                                                                                                                                                                                                                                                                                                                                                                                                                                                                                                                     | 7.062            |
| citrate (2.67)                                                                                                                                                                                                                                                                                                                                                                                                                                                                                                                                                                                                                                                                                                                                      | 0.391            | acetoacetate (2.23)                                                                                                                                                                                                                                                                                                                                                                                                                                                                                                                                                                                                                                                                                                                                  | 7.001            |
| mobile-lipids & 2-hydroxyisovalerate (0.84)                                                                                                                                                                                                                                                                                                                                                                                                                                                                                                                                                                                                                                                                                                         | 0.365            | lactate/glucarate (4.13)                                                                                                                                                                                                                                                                                                                                                                                                                                                                                                                                                                                                                                                                                                                             | 4.071            |
| citrate (2.7)                                                                                                                                                                                                                                                                                                                                                                                                                                                                                                                                                                                                                                                                                                                                       | 0.364            | glucose (3.4)                                                                                                                                                                                                                                                                                                                                                                                                                                                                                                                                                                                                                                                                                                                                        | 3.743            |
| unknown (2.72)                                                                                                                                                                                                                                                                                                                                                                                                                                                                                                                                                                                                                                                                                                                                      | 0.363            | unknown (4.4)                                                                                                                                                                                                                                                                                                                                                                                                                                                                                                                                                                                                                                                                                                                                        | 3.217            |
| glucose (3.24)                                                                                                                                                                                                                                                                                                                                                                                                                                                                                                                                                                                                                                                                                                                                      | 0.362            | glucose (3.46)                                                                                                                                                                                                                                                                                                                                                                                                                                                                                                                                                                                                                                                                                                                                       | 2.191            |
| citrate (2.75)                                                                                                                                                                                                                                                                                                                                                                                                                                                                                                                                                                                                                                                                                                                                      | 0.35             | glucose/unknown (3.71)                                                                                                                                                                                                                                                                                                                                                                                                                                                                                                                                                                                                                                                                                                                               | 2.138            |
| 2-hydroxybutyrate (0.92)                                                                                                                                                                                                                                                                                                                                                                                                                                                                                                                                                                                                                                                                                                                            | 0.348            | unknown (3.67)                                                                                                                                                                                                                                                                                                                                                                                                                                                                                                                                                                                                                                                                                                                                       | 1.393            |
| unknown (8.2)                                                                                                                                                                                                                                                                                                                                                                                                                                                                                                                                                                                                                                                                                                                                       | 0.331            | myoinositol (3.58)                                                                                                                                                                                                                                                                                                                                                                                                                                                                                                                                                                                                                                                                                                                                   | 1.393            |

|                                  |       |                          |       |
|----------------------------------|-------|--------------------------|-------|
| isopropanol (1.18)               | 0.329 | proline (3.37)           | 0.765 |
| unknown (2.74)                   | 0.323 | glucose (3.54)           | 0.725 |
| unknown (7.38)                   | 0.295 | glucose (3.41)           | 0.7   |
| mobile lipids (5.31)             | 0.291 | glucose (3.44)           | 0.694 |
| mobile lipids (1.23)             | 0.285 | propylene-glycol (1.15)  | 0.688 |
| 2-hydroxyvalerate (4.07)         | 0.284 | glucose (3.72)           | 0.647 |
| leucine (0.94)                   | 0.28  | glucose (3.9)            | 0.614 |
| unknown (3.34)                   | 0.265 | glucose (3.5)            | 0.599 |
| lysine (3.05)                    | 0.262 | glucose (3.47)           | 0.574 |
| histidine/unknown (3.17)         | 0.262 | glucose (3.82)           | 0.561 |
| unknown (2.78)                   | 0.258 | glucose (3.48)           | 0.551 |
| mobile lipids (1.96)             | 0.257 | glucose (3.49)           | 0.536 |
| glutamate (2.26)                 | 0.256 | glucose (3.43)           | 0.525 |
| mobile lipids (0.9)              | 0.252 | glucose (3.27)           | 0.522 |
| unknown (1.09)                   | 0.239 | glucose (3.25)           | 0.518 |
| creatinine (4.06)                | 0.238 | histidine/unknown (3.17) | 0.514 |
| glucarate/myoinositol (4.04)     | 0.226 | glucose (3.42)           | 0.51  |
| unknown (3.28)                   | 0.219 | glucose (3.74)           | 0.51  |
| unknown (4.32)                   | 0.218 | glucose (3.55)           | 0.5   |
| 3-hydroxybutyrate (4.16)         | 0.212 | glucose (3.24)           | 0.461 |
| unknown (3.64)                   | 0.202 | glucose (5.24)           | 0.451 |
| unknown (3.64)                   | 0.199 | glutamine (2.14)         | 0.447 |
| unknown (7.06)                   | 0.197 | glucose (3.84)           | 0.436 |
| histidine (7.06)                 | 0.196 | unknown (3.81)           | 0.362 |
| unknown (2.89)                   | 0.192 | glucose (3.86)           | 0.356 |
| proline (2.33)                   | 0.192 | glucose (3.79)           | 0.326 |
| histidine & unknown (3.13)       | 0.184 | unknown (3.26)           | 0.303 |
| unknown (2.83)                   | 0.184 | glucose (3.52)           | 0.3   |
| glutamate (2.48)                 | 0.181 | unknown (3)              | 0.289 |
| arginine & phosphocholine (3.22) | 0.178 | glucose (3.78)           | 0.259 |
| proline & glutamate (2.01)       | 0.177 | glucose (3.91)           | 0.251 |
| 3-hydroxybutyrate (2.42)         | 0.174 | glucose (3.75)           | 0.245 |
| unknown (1.41)                   | 0.172 | unknown (3.28)           | 0.228 |
| myoinositol (3.58)               | 0.172 | unknown (3.76)           | 0.223 |
| unknown (1.86)                   | 0.167 | unknown (4.46)           | 0.202 |
| propylene-glycol (1.15)          | 0.161 | unknown (5.39)           | 0.171 |
| lysine (3.03)                    | 0.161 | mobile lipids (1.23)     | 0.133 |
| unknown (1.37)                   | 0.157 | mobile lipids (1.96)     | 0.123 |
| mobile lipids (1.29)             | 0.153 | unknown (2.89)           | 0.118 |
| glycylproline (2.05)             | 0.147 | tyrosine (7.2)           | 0.087 |
| Isoleucine/Leucine (0.95)        | 0.137 | unknown (3.63)           | 0.081 |
| unknown (1.45)                   | 0.136 | glutamate (2.48)         | 0.063 |
| unknown (1.54)                   | 0.125 | unknown (7)              | 0.059 |
| unknown (1.93)                   | 0.123 | lactate (4.11)           | 0.055 |
| phenylalanine (7.34)             | 0.11  | unknown (7.23)           | 0.049 |
| glutamate/proline (2.09)         | 0.106 | unknown (1.41)           | 0.048 |
| unknown (3.67)                   | 0.102 | histidine/unknown (3.13) | 0.047 |
| unknown (5.39)                   | 0.095 | unknown (2.7)            | 0.043 |
| arginine (1.89)                  | 0.09  | unknown (2.44)           | 0.033 |
| creatinine (3.04)                | 0.088 | unknown (3.88)           | 0.004 |
| acetoacetate (2.23)              | 0.087 | unknown (2.58)           | 0.003 |
| unknown (3.76)                   | 0.084 | creatinine (3.04)        | 0.002 |
| unknown (3.81)                   | 0.075 |                          |       |
| unknown (7.33)                   | 0.072 |                          |       |

|                                         |       |  |  |
|-----------------------------------------|-------|--|--|
| glutamine (2.14)                        | 0.067 |  |  |
| phenylalanine (7.31)                    | 0.067 |  |  |
| Isoleucine (1.02)                       | 0.065 |  |  |
| unknown (2.58)                          | 0.054 |  |  |
| mannose (5.19)                          | 0.051 |  |  |
| Isoleucine (0.97)                       | 0.044 |  |  |
| glutamate & 3-hydroxybutyrate<br>(2.27) | 0.042 |  |  |
| unknown (3.35)                          | 0.039 |  |  |
| histidine (7.81)                        | 0.039 |  |  |
| lipid & unknown (3.97)                  | 0.032 |  |  |
| creatine (3.93)                         | 0.026 |  |  |
| acetate (1.92)                          | 0.022 |  |  |
| valine (0.99)                           | 0.015 |  |  |
| lactate (1.33)                          | 0.012 |  |  |
| valine (1.04)                           | 0.011 |  |  |
| unknown (3.3)                           | 0.009 |  |  |
| unknown (2.44)                          | 0.008 |  |  |
| unknown (1.92)                          | 0.005 |  |  |



**Table S2. FUMA SNP annotation and gene set enrichment analysis of significant SNPs from mGWAS.** Nine genome-wide significant ( $p < 5 \times 10^{-8}$ ) SNPs from mGWAS analysis metabolite bins were obtained. SNPs *cis*-eQTL were mapped to GTex v8 tissue database. NA = No significant eQTL or tissue identified.

\* = upregulated differentially expressed gene sets, significant after FDR ( $p < 0.05$ )

|         | Metabolite bin<br>(chemical shift in<br>ppm) | Chr          | rsID        | P        | Gene              | Function          | cis-<br>eQTL | Tissue  |
|---------|----------------------------------------------|--------------|-------------|----------|-------------------|-------------------|--------------|---------|
| Week 16 | phenylalanine<br>(7.43)                      | 11:97799649  | rs117209391 | 9.96E-09 | RP11-<br>379J13.2 | ncRNA<br>intronic | NA           | NA      |
|         | 2-hydroxybutyrate<br>(0.92)                  | 13:107518761 | rs9301166   | 1.36E-08 | PPIAP24           | intergenic        | NA           | NA      |
|         | proline (3.37)                               | 6:94722833   | rs116984633 | 2.84E-08 | RP11-<br>524K14.1 | intergenic        | NA           | NA      |
|         | <b>lactate (4.11)</b>                        | 9:122774973  | rs7867041   | 3.08E-08 | RP11-<br>360A18.1 | intergenic        | TRAF1        | NA      |
|         | unknown (7.06)                               | 15:27961561  | rs3097466   | 3.56E-08 | RP11-30G8.1       | intergenic        | NA           | NA      |
|         | proline (2.33)                               | 18:44144080  | rs117635196 | 3.63E-08 | LOXHD1            | intronic          | NA           | NA      |
| Week 20 | glucose (3.77)                               | 2:169351131  | rs11897514  | 2.58E-08 | CERS6             | intronic          | NA           | NA      |
|         | myoinositol (3.58)                           | 13:112191253 | rs9522264   | 2.88E-08 | RP11-<br>65D24.2  | intergenic        | NA           | NA      |
|         | lactate (4.11)                               | 4:30111285   | rs79350708  | 3.53E-08 | RP11-<br>174E22.2 | intergenic        | NA           | Breast* |
